# Supplementary material for: Serum vitamin D concentrations and sleep disorders: insights from NHANES 2011–2016 and Mendelian Randomization analysis
Source: Springer Nature journal article supplement (doi:10.1007/s11325-024-03031-2), 2024-05-13
Supplement: MOESM1 [file 27084432]

Supplementary Table 1: Comparison Among Different Vitamin D Groups

| Variables                 | Q1<br>N=1686(25%) | Q2<br>N=1226(25%) | Q3<br>N=1085(25%) | Q4<br>N=916(25%) | P value |
|---------------------------|-------------------|-------------------|-------------------|------------------|---------|
| Age                       |                   |                   |                   |                  | 0.002   |
| 20-29                     | 601 (35%)         | 405 (33.1%)       | 337(31%)          | 265 (29%)        |         |
| 30-39                     | 548 (33%)         | 414 (33.7%)       | 333(30%)          | 283 (31%)        |         |
| 40-50                     | 537 (32%)         | 407 (33.2%)       | 415 (38%)         | 368 (40%)        |         |
| Race/ethnicity            |                   |                   |                   |                  | <0.001  |
| Mexican American          | 233 (14%)         | 241 (20%)         | 140 (13%)         | 49 (5.3%)        |         |
| Non-Hispanic white        | 292 (17%)         | 446 (36%)         | 551 (51%)         | 630 (68.8%)      |         |
| Non-Hispanic Black        | 695 (41%)         | 185 (15%)         | 110 (10%)         | 52 (5.7%)        |         |
| Other                     | 466 (28%)         | 354 (29%)         | 284 (26%)         | 185 (20.2%)      |         |
| Gender                    |                   |                   |                   |                  | <0.001  |
| Male                      | 821 (49%)         | 688 (56%)         | 550 (51%)         | 405 (44%)        |         |
| Female                    | 865 (51%)         | 538(44%)          | 535 (49%)         | 511 (56%)        |         |
| Married/live with partner |                   |                   |                   |                  | <0.001  |
| Yes                       | 832 (49%)         | 741 (60%)         | 692 (64%)         | 581 (63%)        |         |
| No                        | 854 (51%)         | 485 (40%)         | 393 (36%)         | 335 (37%)        |         |
| Education                 |                   |                   |                   |                  | <0.001  |
| Below high school         | 311 (18%)         | 241 (19%)         | 191 (17.6%)       | 117 (12.7%)      |         |
| High School or above      | 1375 (82%)        | 985 (81%)         | 894 (82.3%)       | 799 (87.2%)      |         |
| Poverty income ratio      |                   |                   |                   |                  | <0.001  |
| Poor                      | 626 (37%)         | 433 (35%)         | 330 (30%)         | 267 (29%)        |         |
| Not poor                  | 1060 (63%)        | 793 (65%)         | 755 (70%)         | 649 (71%)        |         |
| Obesity                   |                   |                   |                   |                  | <0.001  |
| Yes                       | 748 (44%)         | 450 (37%)         | 337 (31%)         | 223 (24%)        |         |
| No                        | 938 (56%)         | 776 (63%)         | 748 (69%)         | 693 (76%)        |         |
| Smoking                   |                   |                   |                   |                  | 0.2     |
| Yes                       | 420 (25%)         | 268 (22%)         | 246 (22%)         | 218 (23%)        |         |
| No                        | 1266 (75%)        | 958 (78%)         | 839 (78%)         | 698 (77%)        |         |
| Alcohol use               |                   |                   |                   |                  | <0.001  |
| Yes                       | 1210 (72%)        | 922 (75%)         | 871 (80%)         | 749 (82%)        |         |
| No                        | 475 (28%)         | 303 (25%)         | 214 (20%)         | 165 (18%)        |         |
| Hypertension history      |                   |                   |                   |                  | 0.005   |
| Yes                       | 447 (27%)         | 252 (20%)         | 218 (20%)         | 195 (21%)        |         |
| No                        | 1239 (73%)        | 974 (80%)         | 867 (80%)         | 721 (79%)        |         |

|                |            |            |              |             |        |
|----------------|------------|------------|--------------|-------------|--------|
| DM history     |            |            |              |             | <0.001 |
| Yes            | 174 (10%)  | 77 (6.0%)  | 71 (6.5%)    | 39 (4.3%)   |        |
| No             | 1509 (90%) | 1149 (94%) | 1014 (93.5%) | 876 (95.7%) |        |
| Sleep disorder |            |            |              |             | 0.008  |
| Yes            | 244 (14%)  | 174 (14%)  | 154 (14%)    | 118 (13%)   |        |
| No             | 1442 (86%) | 1052 (86%) | 931 (86%)    | 798 (87%)   |        |

---
